# Supplementary material for: Thymidine-functionalized silica nanotubes for selective recognition and separation of oligoadenosines
Source: Royal Society of Chemistry journal article supplement (doi:10.1039/b923029g), 2010-01-01
Supplement: b923029g.pdf [file b923029g.pdf]

## Electronic Supplementary Information (ESI)

### **Thymidine-functionalized silica nanotubes for selective recognition and separation of oligoadenosine**

*Nam Hoon Kim<sup>a</sup> Hye Young Lee,<sup>a</sup> Young Je Cho,<sup>a</sup> Won Seok Han<sup>\*b</sup> Dongmin Kang,<sup>b</sup> Shim Sung Lee,<sup>a</sup>  
and Jong Hwa Jung<sup>\*a</sup>*

*<sup>a</sup>Department of Chemistry, Research Institute of Natural Sciences and Environmental  
Biotechnology National Core Research Center, Gyeongsang National University, Jinju  
660-701, Korea*

*<sup>b</sup>Division of Life and Pharmaceutical Sciences, Ewha Womans University, Seoul 120-750,  
Korea*

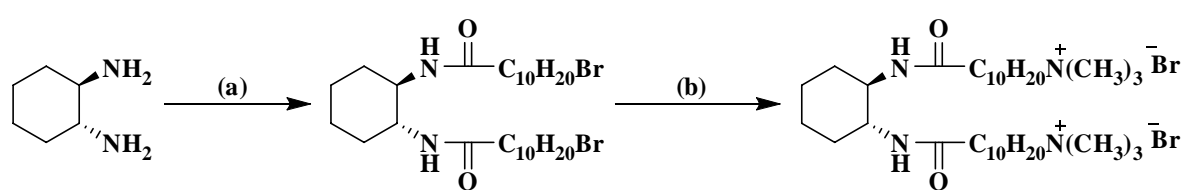

(a) 11-bromoundecanoic acid, DCC, DMAP, THF

(b) TMA, THF/DMF

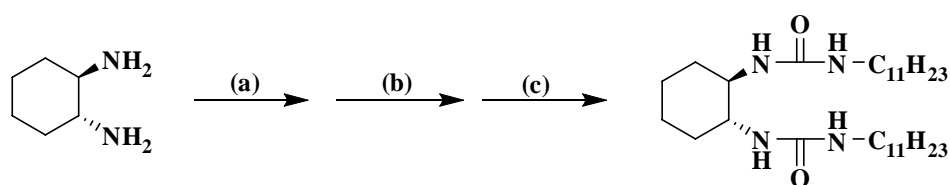

(a) dodecylisocyanate, toluene

(b) DCM

(c) diethylether

**Scheme S1.** Synthetic routes of organogelators **9** and **10**.

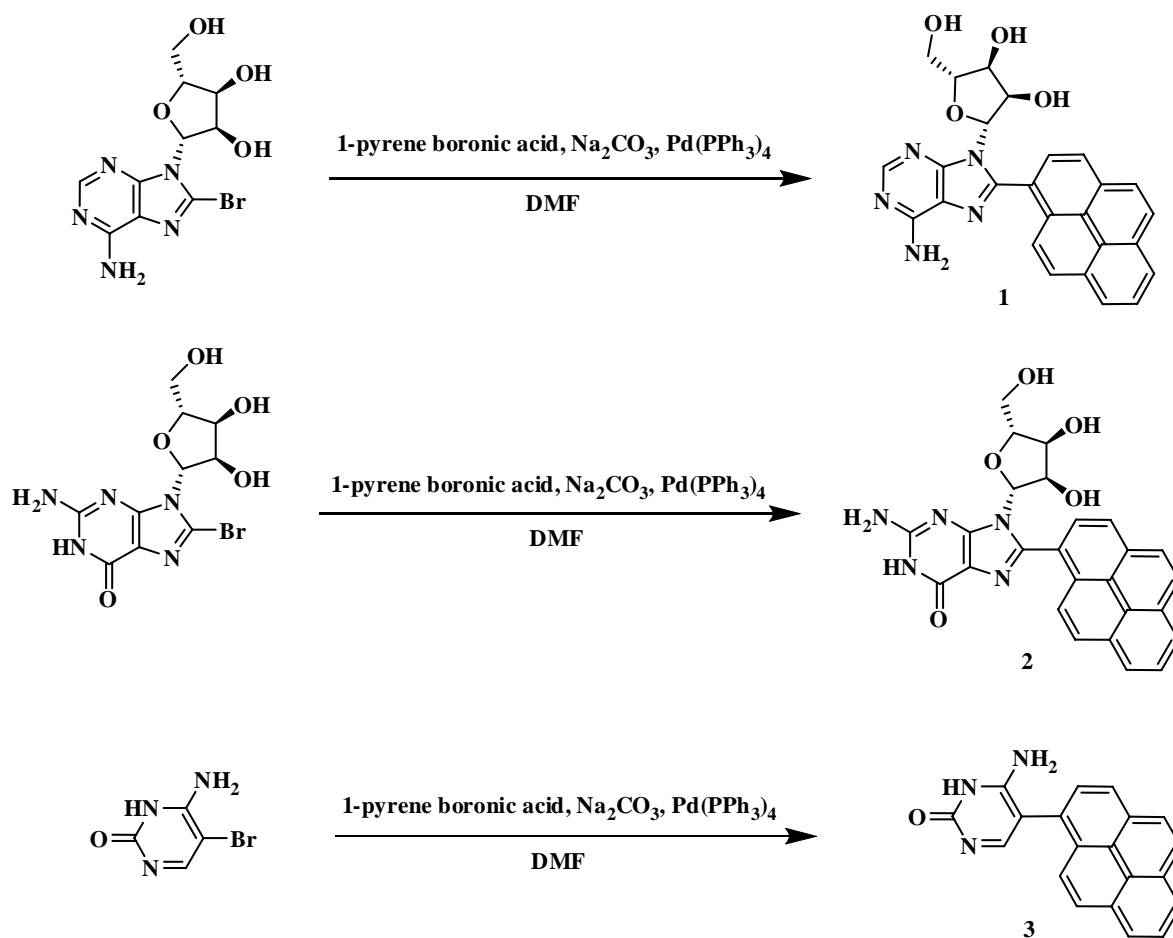

**Scheme S2.** Synthetic routes for compounds 1-3 as guest molecules.

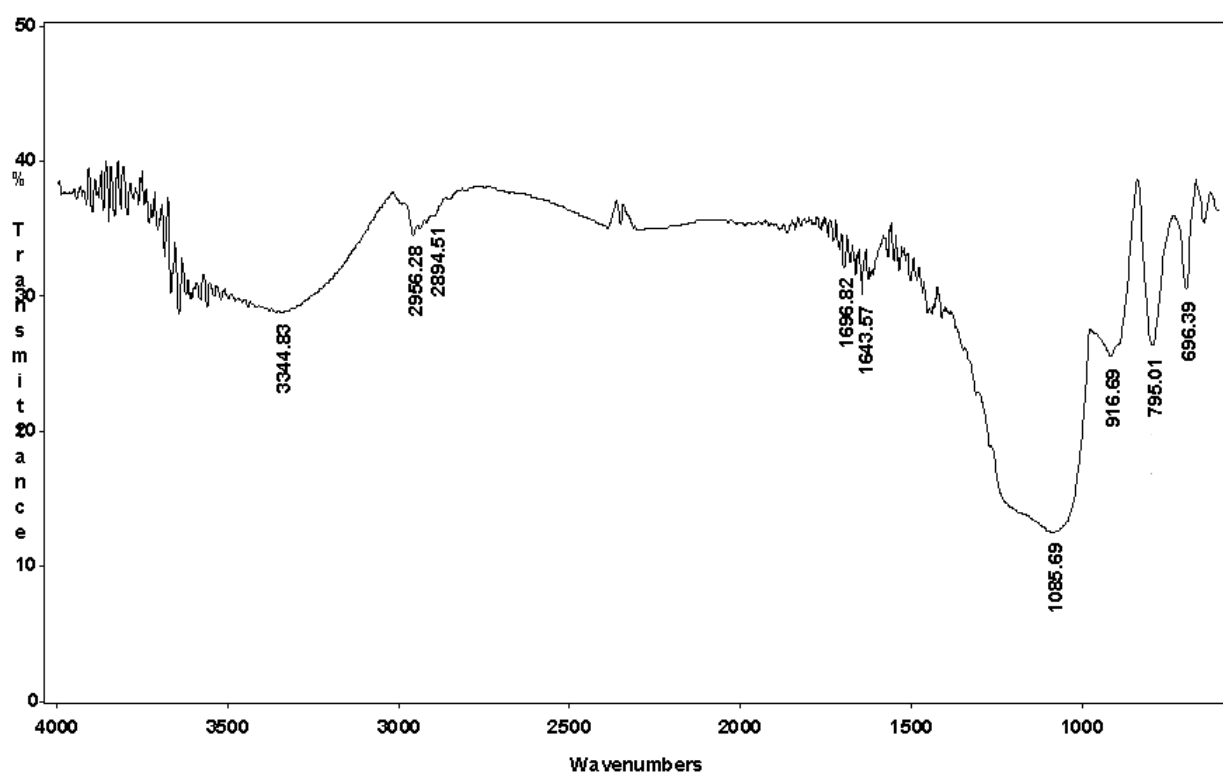

**Fig. S1** FT-IR spectrum of CNTs after attachment of the chloropropyl silane group.

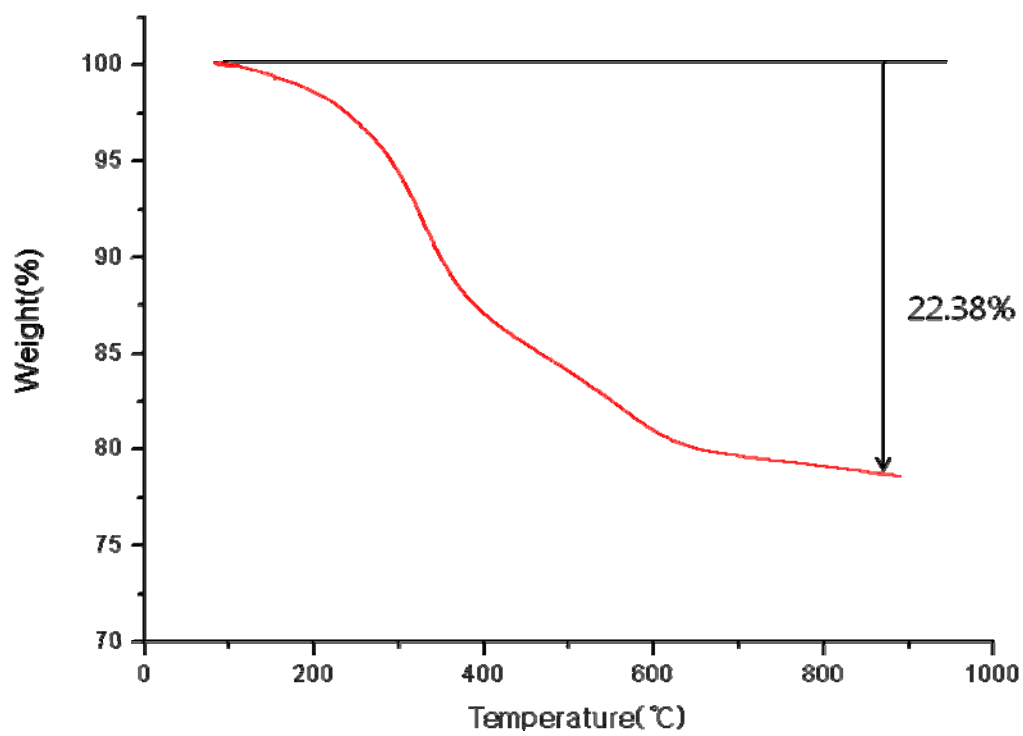

**Fig. S2** TGA data of the chloropropyl silane group attached SNTs after remove template.

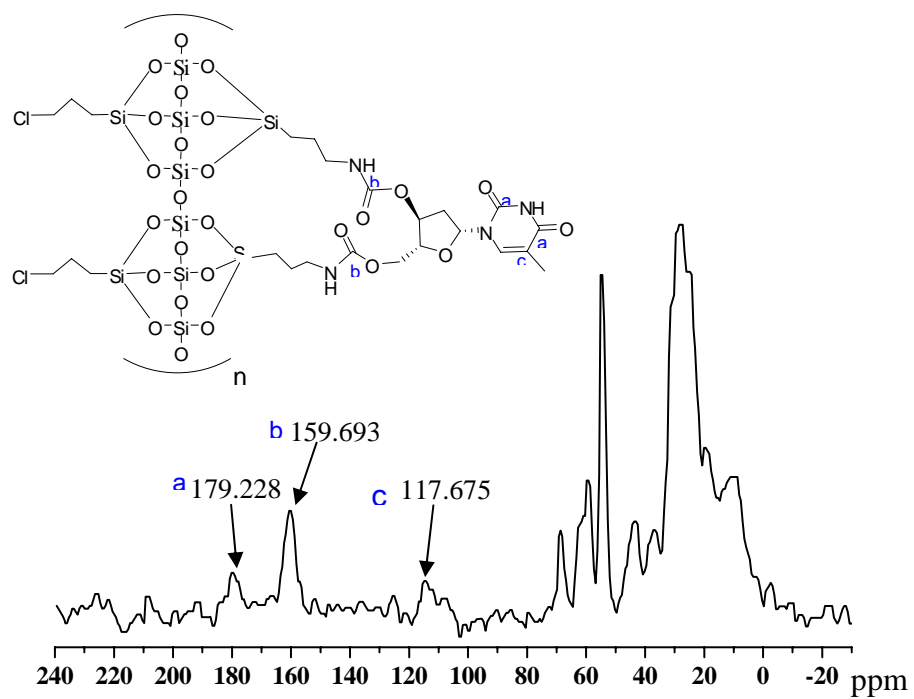

**Fig. S3** <sup>13</sup>C CP/MAS of T-SNTs.

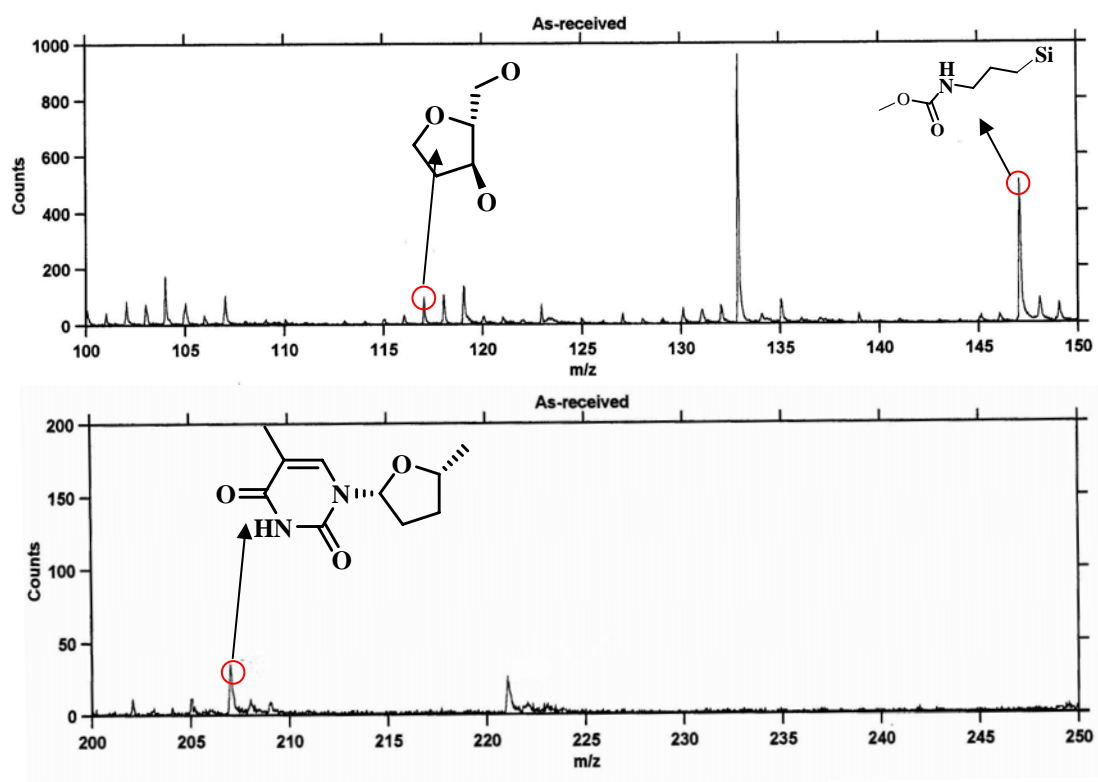

**Fig. S4** TOF-SIMS spectra of T-SNTs.

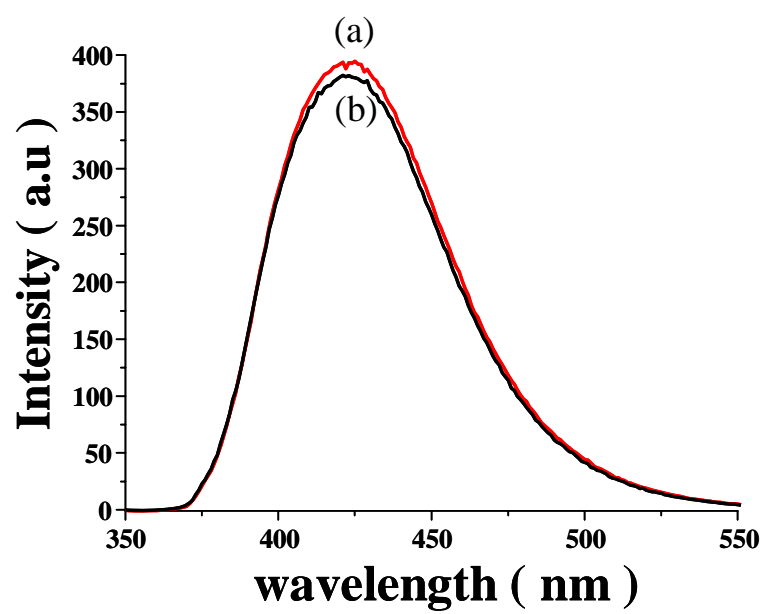



**Fig. S5** Fluorescence spectra change of adenosine derivative **1** ( $2.5 \times 10^{-6}$ M) (a) before and (b) after addition of **SNTs** (0.25mg) in aqueous solution (pH 7.4).

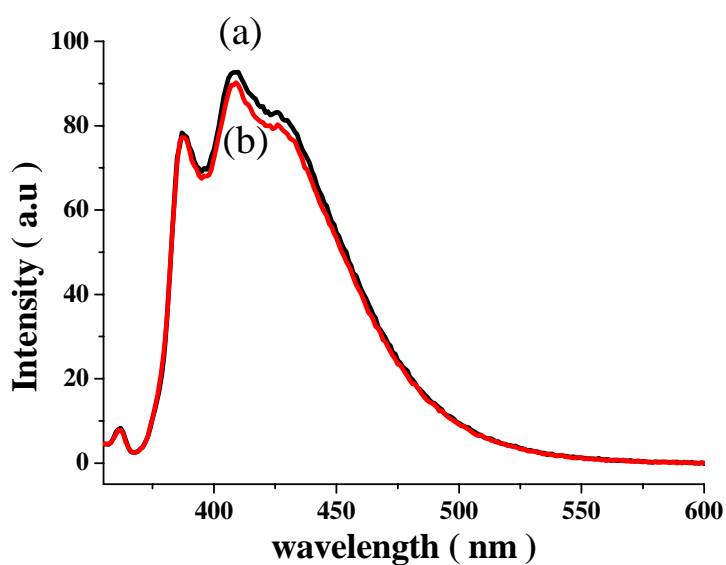

**Fig. S6** Fluorescence spectra of cytosine derivative **3** ( $2.5 \times 10^{-6}$ M) (a) before and (b) after addition of **T-SNTs** (0.25 mg) in aqueous solution (pH 7.4).



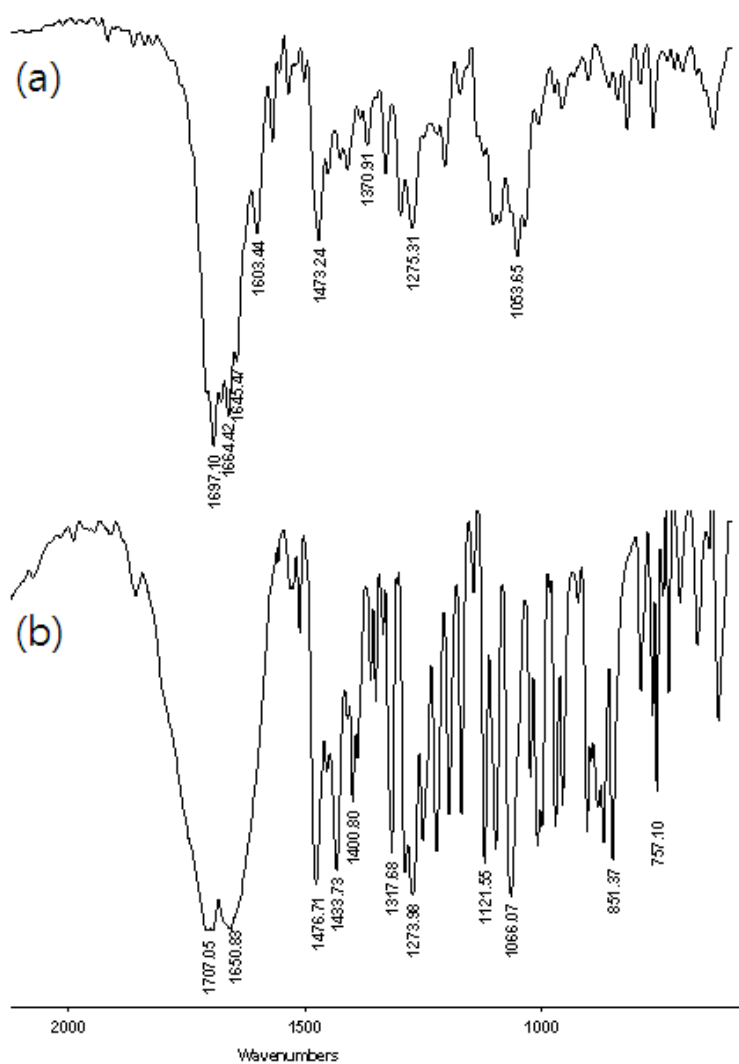

**Fig. S7** FT-IR spectra of T-SNTs in (a) the presence and (b) the absence of adenosine.

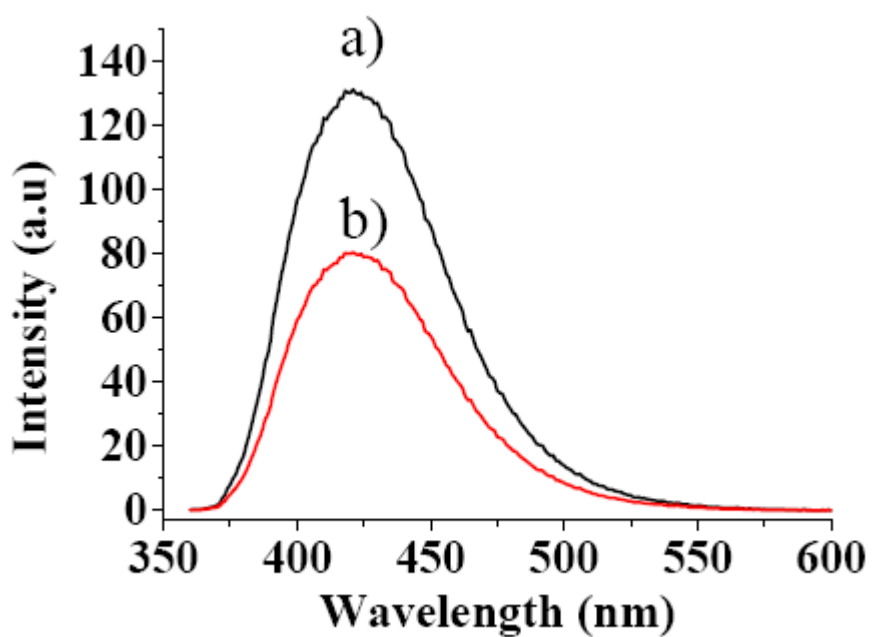

**Fig. S8** Fluorescence spectra change of adenosine derivative **1** ( $2.5 \times 10^{-6}$ M) (a) before and (b) after addition of **T-SPs** (0.25mg) in aqueous solution (pH 7.4).

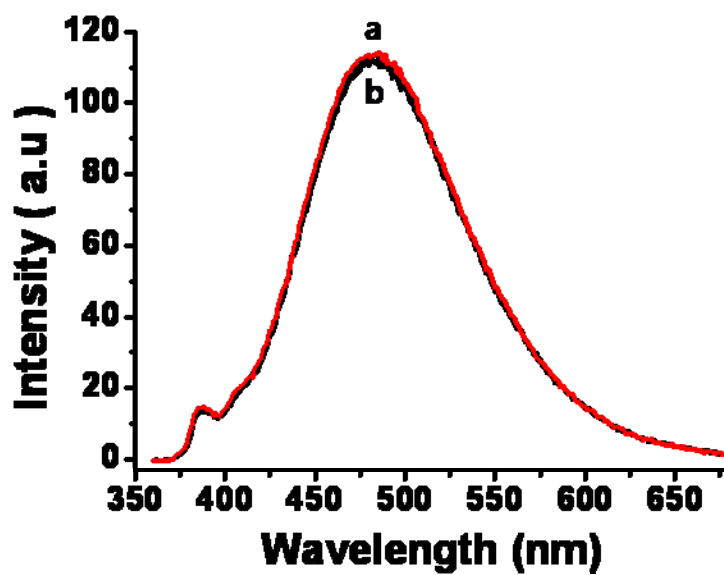

**Fig. S9** Fluorescence spectra change of guanosine derivative **2** ( $2.5 \times 10^{-6}$ M) (a) before and (b) after addition of **T-SPs** (0.25mg) in aqueous solution (pH 7.4).

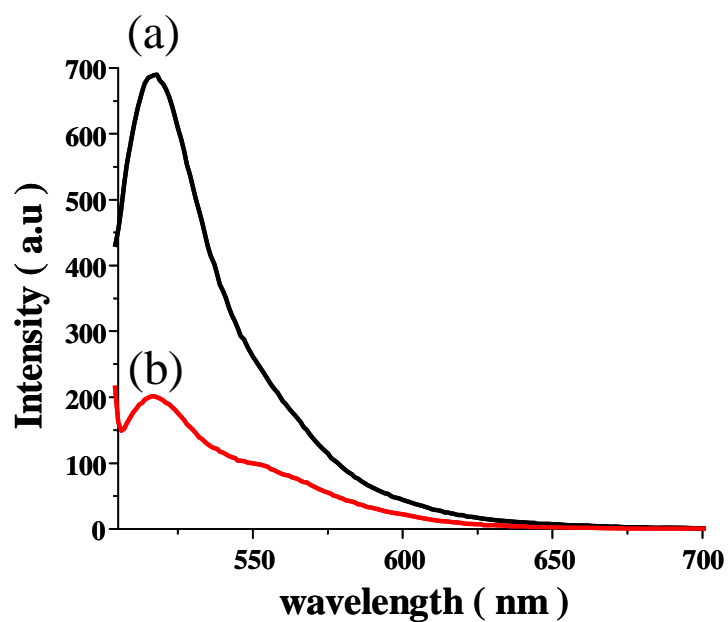

**Fig. S10** Fluorescence intensity change of oligonucleotide **6** ( $2.5 \times 10^{-6}$  M) (a) before and (b) after addition of **T-SNTs** (0.25 mg) in aqueous solution (pH 7.4).

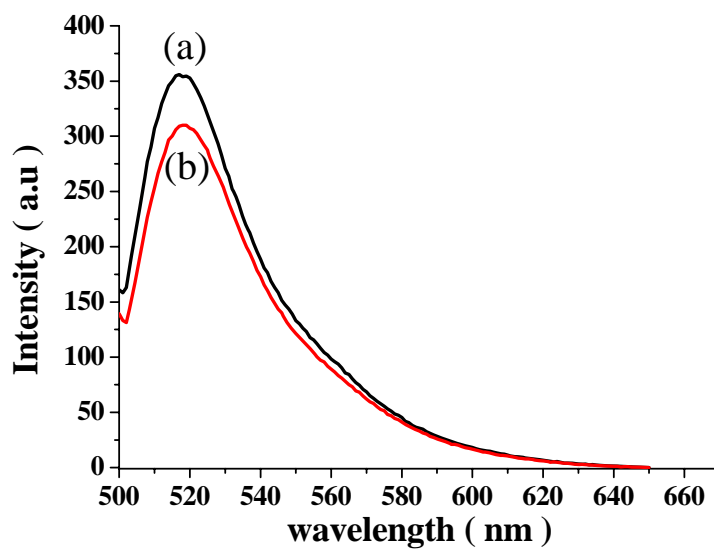

**Fig. S11** Fluorescence intensity change of oligonucleotide **7** ( $2.5 \times 10^{-6}$  M) (a) before and (b) after addition of **T-SNTs** (0.25 mg) in aqueous solution (pH 7.4).

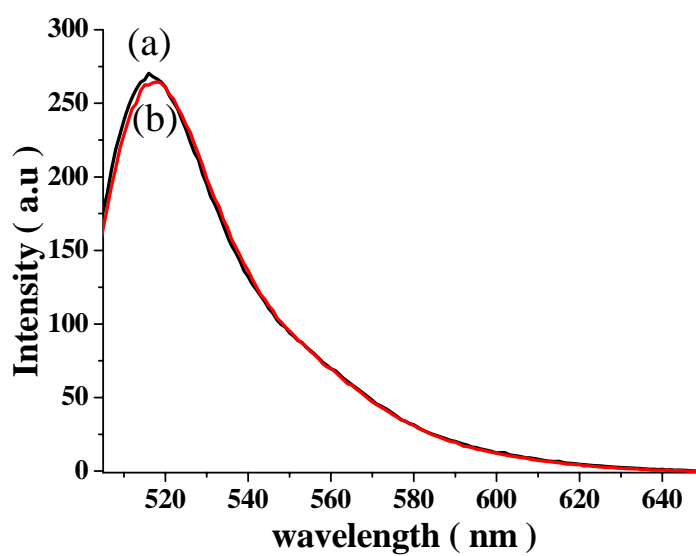

**Fig. S12** Fluorescence spectra of oligonucleotide **8** ( $2.5 \times 10^{-6}$  M) (a) before and (b) after addition of **T-SNTs** (0.25 mg) in aqueous solution (pH 7.4).
